# Supplementary material
Source: publisher figshare collection journal article supplement (https://karger.figshare.com/ndownloader/files/20019539)
Supplement: Supplementary file 1 [file 20019539]

**Searching strategy**

We searched published literature in PubMed from the 1950s to the present using keywords as ((("Carcinoma, Hepatocellular"[Mesh] OR Hepatoma OR Hepatomas) OR ((Hepatocellular OR hepatic) AND (Tumor OR Tumors OR Carcinoma OR Carcinomas OR Malignancy OR Malignancies))) AND ((Heart OR Hearts' OR Heart's OR Cardiac OR Atrial OR Atrium OR Ventricle OR Ventricular) AND (Metastasis OR Metastases OR Metastatic))). Initially 940 articles were screened and excluded with following criteria: not related topics (n = 746), duplications (n = 2), publication type other than case reports/series (n = 24), intervention not available (n = 14), outcome not available (n = 28), and article not available (n = 58). Totally 73 articles were included with 79 subject patients analyzed.

**References**

1. [Kim DH](https://www.ncbi.nlm.nih.gov/pubmed/?term=Kim DH%5BAuthor%5D&cauthor=true&cauthor_uid=30334999), [Cho E](https://www.ncbi.nlm.nih.gov/pubmed/?term=Cho E%5BAuthor%5D&cauthor=true&cauthor_uid=30334999), [Cho SB](https://www.ncbi.nlm.nih.gov/pubmed/?term=Cho SB%5BAuthor%5D&cauthor=true&cauthor_uid=30334999), et al. Complete response of hepatocellular carcinoma with right atrium and pulmonary metastases treated by combined treatments (a possible treatment effect of natural killer cell): A case report and literature review. [Medicine (Baltimore)](https://www.ncbi.nlm.nih.gov/pmc/articles/PMC6211840/). 2018;97:e12866.
2. [Dokmak S](https://www.ncbi.nlm.nih.gov/pubmed/?term=Dokmak S%5BAuthor%5D&cauthor=true&cauthor_uid=29536209), [Aussilhou B](https://www.ncbi.nlm.nih.gov/pubmed/?term=Aussilhou B%5BAuthor%5D&cauthor=true&cauthor_uid=29536209), [Marchese T](https://www.ncbi.nlm.nih.gov/pubmed/?term=Marchese T%5BAuthor%5D&cauthor=true&cauthor_uid=29536209), et al. Right trisectionectomy and caval reconstruction with peritoneal patch under short total vascular exclusion for hepatocellular carcinoma with tumoral thrombus in suprahepatic vena cava. [Ann Surg Oncol.](https://www.ncbi.nlm.nih.gov/pubmed/?term=Right+Trisectionectomy+and+Caval+Reconstruction+with+Peritoneal+Patch+Under+Short+Total+Vascular+Exclusion+for+hepatocellular+carcinoma+with+Tumoral+Thrombus+in+Suprahepatic+Vena+Cava) 2018;25:1152.
3. [Ninomiya R](https://www.ncbi.nlm.nih.gov/pubmed/?term=Ninomiya R%5BAuthor%5D&cauthor=true&cauthor_uid=29483457), [Nakazawa A](https://www.ncbi.nlm.nih.gov/pubmed/?term=Nakazawa A%5BAuthor%5D&cauthor=true&cauthor_uid=29483457), [Mitsui T](https://www.ncbi.nlm.nih.gov/pubmed/?term=Mitsui T%5BAuthor%5D&cauthor=true&cauthor_uid=29483457), et al. Resection for the recurrence of hepatocellular carcinoma in the inferior vena cava and right atrium under deep hypothermic circulatory arrest. Gan To Kagaku Ryoho. 2018;45:390-392.
4. [Gray WH](https://www.ncbi.nlm.nih.gov/pubmed/?term=Gray WH%5BAuthor%5D&cauthor=true&cauthor_uid=29455819), [Patel R](https://www.ncbi.nlm.nih.gov/pubmed/?term=Patel R%5BAuthor%5D&cauthor=true&cauthor_uid=29455819), [Baker CJ](https://www.ncbi.nlm.nih.gov/pubmed/?term=Baker CJ%5BAuthor%5D&cauthor=true&cauthor_uid=29455819), et al. Resection of metastatic hepatocellular carcinoma in the ventricular septum causing left ventricular outflow tract obstruction. Ann Thorac Surg. 2018;105:e107-e108.
5. Otsuru T, Kobayashi S, Eguchi H, et al. A case of hepatocellular carcinoma with right atrium tumor thrombus and multiple intrahepatic metastases that remarkably responded to combination therapy including surgery. Gan To Kagaku Ryoho. 2018;45:187-189.
6. Sabzi F, Heidari A, Faraji R. Isolated right atrial mass in a candidate of coronary bypass grafting. Acta Med Iran. 2017;55:722-725.
7. Kornberger A, Emrich T, Beiras-Fernandez A, et al. Restrictive surgical approach to palliate angina in a patient with coronary three vessel disease and biventricular metastatic hepatocellular carcinoma. World J Surg Oncol. 2017;15:217.
8. Komarov RN, Alikhanov RB, Chernyavskiy SV, et al. Left hemihepatectomy with thrombectomy from inferior vena cava and right atrium under cardiopulmonary bypass in patient with hepatocellular carcinoma. Khirurgiia (Mosk). 2017;11:82-84.
9. Takaya H, Kawaratani H, Seki K, et al. A patient with hepatocellular carcinoma with isolated right atrial metastases. Intern Med. 2017;56:2589-94.
10. Abdelhady K, Karavites LC, Durgam S, et al. Metastatic right atrial hepatoma. J Card Surg. 2017;32:368-369.
11. Florimonte L, Iavarone M, Castellani M, et al. Uncommon extrahepatic metastases from hepatocellular carcinoma. Hepatology. 2017;66:986-988.
12. Fujita A, Kobayashi T, Hironaka H, et al. Surgical treatment of right atrial malignant tumor thrombus under deep hypothermia with intermittent circulatory arrest; report of two cases. Kyobu Geka. 2016;69:1094-1097.
13. Pectasides E, Miksad R, Pyatibrat S, et al. Spontaneous regression of hepatocellular carcinoma with multiple lung metastases: a case report and review of the literature. Dig Dis Sci. 2016;61:2749-54.
14. Luo X1, Zhang B, Dong S, et al. Hepatocellular carcinoma with tumor thrombus occupying the right atrium and portal vein: a case report and literature review. Medicine (Baltimore). 2015;94:e1049.
15. Monzio Compagnoni N, Durkovic S, Alamanni F, et al. Resection of right ventricular metastasis subsequent to liver transplant for hepatocellular carcinoma. J Card Surg. 2015;30:656-8.
16. Hyuga S, Tomokuni A, Tomimaru Y, et al. Long-term survival in a case of advanced hepatocellular carcinoma with tumor thrombus in the portal vein and the right atrium (vp4, vv3) treated successfully with multidisciplinary therapies. Gan To Kagaku Ryoho. 2014;41:2130-2.
17. Hayashida K, Okumura S, Kawase T. Right atrial obstruction due to cardiac extension of hepatocellular carcinoma. Asian Cardiovasc Thorac Ann. 2014;22:465-8.
18. Li AJ, Yuan H, Yin L, et al. Cavoatrial thrombectomy in hepatocellular carcinoma with tumor thrombus in the vena cava and atrium without the use of cardiopulmonary bypass. Ann Vasc Surg. 2014;28:1565.e5-8.
19. Tameda M, Shiraki K, Takei Y. Isolated metastasis of hepatocellular carcinoma in the right ventricle. Clin Gastroenterol Hepatol. 2014;12:A25-6.
20. Philipsen TE, Vermeulen T, Conraads VM, et al. Disseminated malignancy after extracorporeal life support and left ventricular assist device, diagnosed by left ventricular apical core biopsy. Interact Cardiovasc Thorac Surg. 2013;17:875-7.
21. Barbero C, Salizzoni S, Centofanti P, et al. Right sided heart mass reveals hepatocellular carcinoma. Heart Lung Circ. 2012;21:817-8.
22. Tastekin E, Usta U, Ege T, et al. Cardiac metastasis of hepatocellular carcinoma in a young non-cirrhotic patient, to the left ventricle. Ann Hepatol. 2012;11:392-4.
23. Ulus T, Birdane A, Dündar E, et al. Asymptomatic course of a metastatic mass completely filling the right atrium in a patient with hepatocellular carcinoma. Turk Kardiyol Dern Ars. 2012;40:52-4.
24. Cakal S1, Cakal B, Alıcı G, et al. Different imaging modalities in detection of a huge intracardiac mass. Heart Lung Circ. 2011;20:773-4.
25. Vijay MK, Das P, Prabhu SB, et al. Pleomorphic giant cell-rich hepatocellular carcinoma presented as a right atrial mass. Indian J Pathol Microbiol. 2011;54:632-4.
26. Dedeilias P, Nenekidis I, Koukis I, et al. Acute heart failure caused by a giant hepatocellular metastatic tumor of the right atrium. J Cardiothorac Surg. 2011;6:102.
27. Inoue Y, Hayashi M, Katsumata T, et al. Hepatocellular carcinoma with right atrial tumor thrombus: report of a case. Surg Today. 2011;41:1122-9.
28. Sakamoto H, Amikura K, Tanaka Y, et al. Successful treatment of multiple pulmonary and peritoneal recurrence of hepatocellular carcinoma with bronchial artery infusion therapy and PEIT followed by surgery--a case report. Gan To Kagaku Ryoho. 2010;37:2687-9.
29. Liu WC, Lui KW, Ho MC, et al. Right ventricular exclusion for hepatocellular carcinoma metastatic to the heart. J Cardiothorac Surg. 2010;5:95.
30. Jeong DS, Sung Kim J, Kim KH, et al. Left atrial metastasis from hepatocellular carcinoma with liver cirrhosis. Interact Cardiovasc Thorac Surg. 2010;11:703-5.
31. Rallidis LS, Papadopoulos CC, Kelekis NL, et al. The role of myocardial contrast echocardiography to assess the origin of a mass in right cardiac cavities. Echocardiography. 2009;26:88-92.
32. Sung AD, Cheng S, Moslehi J, et al. Hepatocellular carcinoma with intracavitary cardiac involvement: a case report and review of the literature. Am J Cardiol. 2008;102:643-5.
33. Kan CB, Chang RY, Chen CK. Isolated right ventricular intracavitary metastasis of hepatocellular carcinoma in a 74-year-old woman. J Chin Med Assoc. 2008;71:318-20.
34. Murakami M, Nagano H, Noda T, et al. A case of hepatocellular carcinoma with right atrium tumor thrombus treated with combined doxorubicin and interferon-beta/intra-arterial injection chemotherapy and hepatectomy. Gan To Kagaku Ryoho. 2007;34:2087-9.
35. Sekine Y, Kitano M, Akimoto T, et al. Isolated intracavitary metastatic hepatocellular carcinoma of the right atrium without inferior vena cava involvement; report of a case. Kyobu Geka. 2007;60:504-7.
36. Kołacz J, Pasowicz M, Fedak A. Hepatocellular carcinoma with metastases to the right atrium - case report. Kardiol Pol. 2007;65:433-5.
37. Mansour Z, Gerelli S, Kindo MJ, et al. Right atrial metastasis from hepatocellular carcinoma. J Card Surg. 2007;22:231-3.
38. Hasuike Y, Fukuchi N, Hayashi N, et al. Effectiveness of radiation therapy to the venous thrombosis between the inferior vena cava and right ventricle. Gan To Kagaku Ryoho. 2006;33:1804-6.
39. Jäkel J, Ramaswamy A, Köhler U, et al. Massive pulmonary tumor microembolism from a hepatocellular carcinoma. Pathol Res Pract. 2006;202:395-9.
40. Chieng SH, Lin CH, Lu MJ, et al. Intracavitary metastatic hepatocellular carcinoma of the right ventricle. Thorac Cardiovasc Surg. 2005;53:123-5.
41. Longo R, Mocini D, Santini M, et al. Unusual sites of metastatic malignancy: case 1. cardiac metastasis in hepatocellular carcinoma. J Clin Oncol. 2004;22:5012-4.
42. Novotný VM, van der Hulst VP, van der Wouw PA, et al. An unusual presentation and way to diagnose hepatocellular carcinoma. Neth J Med. 2004;62:254-6.
43. Masci G, Magagnoli M, Grimaldi A, et al. Metastasis of hepatocellular carcinoma to the heart: a case report and review of the literature. Tumori. 2004;90:345-7.
44. Diaz Castro O, Bueno H, Nebreda LA. Acute myocardial infarction caused by paradoxical tumorous embolism as a manifestation of hepatocarcinoma. Heart. 2004;90:e29.
45. Lin TY, Chiu KM, Chien CY, et al. Case 1. Right ventricular outflow obstruction caused by metastatic hepatocellular carcinoma. J Clin Oncol. 2004;22:1152-3.
46. Kassotis J, Riboti Z, Saul BI, et al. New-onset congestive heart failure secondary to a "huge" right atrial mass--a case report. Angiology. 2004;55:89-92.
47. Syed H, Dubrey S, Tonge K. Right atrial tumour mass of unusual origin. Heart. 2003;89:1335.
48. Vlasseros I, Tapanlis E, Katsaros A, et al. Metastatic hepatocellular carcinoma into the right atrium and ventricle: echocardiographic diagnosis and follow-up. Echocardiography. 2003;20:387-8.
49. Chu MW, Aboguddah A, Kraus PA, et al. Urgent heart surgery for an atrial mass: metastatic hepatocellular carcinoma. Ann Thorac Surg. 2001;72:931-3.
50. Yogita S, Tashiro S, Harada M, et al. Hepatocellular carcinoma with extension into the right atrium: report of a successful liver resection by hepatic vascular exclusion using cardiopulmonary bypass. J Med Invest. 2000;47:155-60.
51. Murakawa T, Takamoto S, Ezure M, et al. Metastatic hepatocellular carcinoma obstructing the right ventricular outflow tract. Jpn J Thorac Cardiovasc Surg. 2000;48:516-9.
52. Wu CC, Hseih S, Ho WM, et al. Surgical treatment for recurrent hepatocellular carcinoma with tumor thrombi in right atrium: using cardiopulmonary bypass and deep hypothermic circulatory arrest. J Surg Oncol. 2000;74:227-31.
53. Marstaller B, Lersch C, Berger H, et al. Hepatocellular carcinoma with extension per continuitatem into the right atrium. Dtsch Med Wochenschr. 2000;125:391-4.
54. Kotani E, Kiuchi K, Takayama M, et al. Effectiveness of transcoronary chemoembolization for metastatic right ventricular tumor derived from hepatocellular carcinoma. Chest. 2000;117:287-9.
55. Kashima Y, Miyazaki M, Ito H, et al. Effective hepatic artery chemoembolization for advanced hepatocellular carcinoma with extensive tumour thrombus through the hepatic vein. J Gastroenterol Hepatol. 1999;14:922-7.
56. Yoshitomi Y, Kojima S, Sugi T, et al. Echocardiography of a right atrial mass in hepatocellular carcinoma. Heart Vessels. 1998;13:45-8.
57. Giacalone A, Suriani A, Monga G. Simulation of right atrial cardiac myxoma by silent hepatocellular carcinoma. Pathol Res Pract. 1996;192:1270-3.
58. Baba HA, Engers R, Heintzen MP. Right atrial metastasis as primary clinical manifestation of hepatocellular carcinoma. Int J Cardiol. 1995;47:281-4.
59. Shibata J, Hayashida T, Ikebe M, et al. A case of hepatocellular carcinoma whose lung metastases and tumor emboli in the inferior vena cava disappeared by oral administration of UFT. Gan To Kagaku Ryoho. 1994;21:1669-72.
60. Sohn JW, Yoon YM, Lee MH, et al. Right atrial mass associated with hepatoma--2 case reports. Korean J Intern Med. 1994;9:116-9.
61. Van Camp G, Abdulsater J, Cosyns B, et al. Transesophageal echocardiography of right atrial metastasis of a hepatocellular carcinoma. Chest. 1994;105:945-7.
62. Noguchi H, Hirai K, Itano S, et al. Small hepatocellular carcinoma with intravascular tumor growth into the right atrium. J Gastroenterol. 1994;29:41-6.
63. Masaki N, Hayashi S, Maruyama T, et al. Marked clinical improvement in patients with hepatocellular carcinoma by surgical removal of extended tumor mass in right atrium and pulmonary arteries. Cancer Chemother Pharmacol. 1994;33(Suppl):S7-11.
64. Dazai Y, Katoh T, Katoh I, et al. Effectiveness of chemoembolization therapy for metastatic right atrial tumor thrombus associated with hepatocellular carcinoma. Chest. 1989;96:434-6.
65. Chua SO, Chiang CW, Lee YS, et al. Echocardiographic findings of mobile atrial hepatocellular carcinoma. Report of five cases. J Ultrasound Med. 1989;8:347-52.
66. Imamoğlu A, Akalin H, Corapçioğlu T, et al. Hepatoma with right atrial extension. Pediatr Cardiol. 1989;10:236-7.
67. Miller DL, Katz NM, Pallas RS. Hepatoma presenting as a right atrial mass. Am Heart J. 1987;114:906-8.
68. Goto H, Kaneko Y, Utoh J, et al. Surgery of hepatoma with intracavitary cardiac extension. Heart Vessels. 1986;2:60-2.
69. Chua SO, Chiang CW, Lee YS, et al. Moving right atrial mass associated with hepatoma. Two cases detected by echocardiography. Chest. 1986;89:148-50.
70. Nakamura Y, Tamura A, Fijimoto H, et al. A case of hepatocellular carcinoma with growth into the right atrium, pulmonary tumor embolism, and cerebral metastasis. Nihon Shokakibyo Gakkai Zasshi. 1985;82:319-23.
71. Tsujimoto M, Aozasa K, Nakajima Y, et al. Hepatocellular carcinoma with sarcomatous proliferation showing an unusual and wide-spread metastasis. Acta Pathol Jpn. 1984;34:839-45.
72. Horiike S, Okuno T, Habuchi Y, et al. Hepatocellular carcinoma presenting as right atrial metastasis: a report of two cases. Nihon Shokakibyo Gakkai Zasshi. 1984;81:1094-8.
73. Ehrich DA, Widmann JJ, Berger RL, et al. Intracavitary cardiac extension of hepatoma. Ann Thorac Surg. 1975;19:206-11.
